# Supplementary material for: A comprehensive pan-cancer analysis of CD274 gene amplification, tumor mutation burden, microsatellite instability, and PD-L1 expression in Chinese cancer patients
Source: PubMed Central journal article supplement — Ann Transl Med. 2021 Apr;9(8):677. doi: 10.21037/atm-21-853 (PMC8106035; doi:10.21037/atm-21-853), 2021-04
Supplement: atm-09-08-677-supplementary.pdf [file atm-09-08-677-supplementary.pdf]

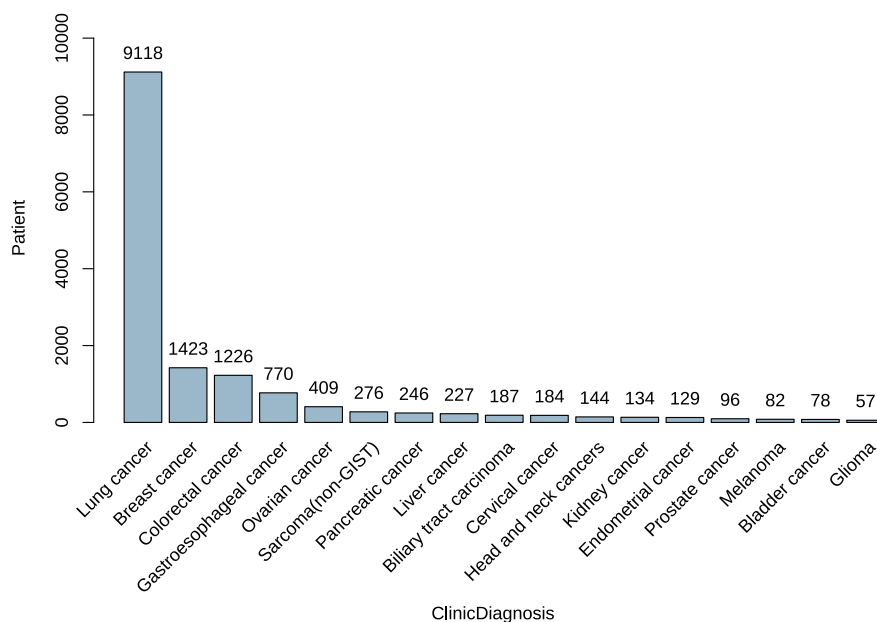

**Figure S1** Distribution of common cancer types in the study cohort. Cancer types with more than 50 samples are indicated in the horizontal axis. The number of patients is indicated in the vertical axis.
